# Supplementary material for: Interface enriched highly interlaced layered MoS2/NiS2 nanocomposites for the photocatalytic degradation of rhodamine B dye
Source: PubMed Central journal article supplement — RSC Adv. 2021 May 27;11(31):19283–93. doi: 10.1039/d1ra01941d (PMC9033572; doi:10.1039/d1ra01941d), 2021-05-27
Supplement: RA-011-D1RA01941D-s001.pdf [file RA-011-D1RA01941D-s001.pdf]

## Supplementary Information

### Interface enriched highly interlaced layered MoS<sub>2</sub>/NiS<sub>2</sub> nanocomposites for the photocatalytic degradation of Rhodamine B dye

S. Harish<sup>1\*</sup>, P. Bharathi<sup>1</sup>, Prachi Prasad<sup>1</sup>, R. Ramesh<sup>3</sup>, S. Ponnusamy<sup>1</sup>,

M. Shimomura<sup>4</sup>, J. Archana<sup>1</sup>, M. Navaneethan<sup>1,2\*</sup>

<sup>1</sup>Functional Materials and Energy Devices Laboratory, Department of Physics and Nanotechnology, SRM Institute of Science and Technology, Kattankulathur-603 203, India

<sup>2</sup>Nanotechnology Research Center (NRC), Faculty of Engineering and Technology, SRM Institute of Science and Technology, Chennai, 603203, Tamil Nadu, India

<sup>3</sup>Department of Physics, Periyar University, Salem 636011, India

<sup>4</sup>Graduate School of Science and Technology, Shizuoka University, 3-5-1 Johoku, Naka-Ku, Hamamatsu, Shizuoka 432-8011, Japan

#### \*Corresponding authors

**Dr. S. Harish**

E-mail: aravindharri@gmail.com

**Dr. M. Navaneethan**

E-mail: m.navaneethan@gmail.com

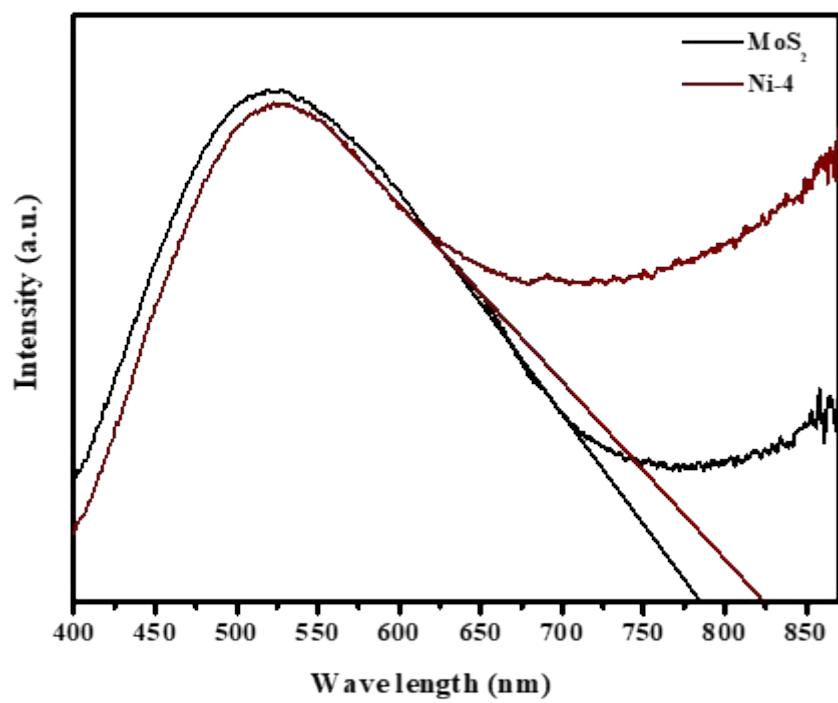

Figure S1 UV-Visible spectra of MoS<sub>2</sub> and Ni-4 samples.

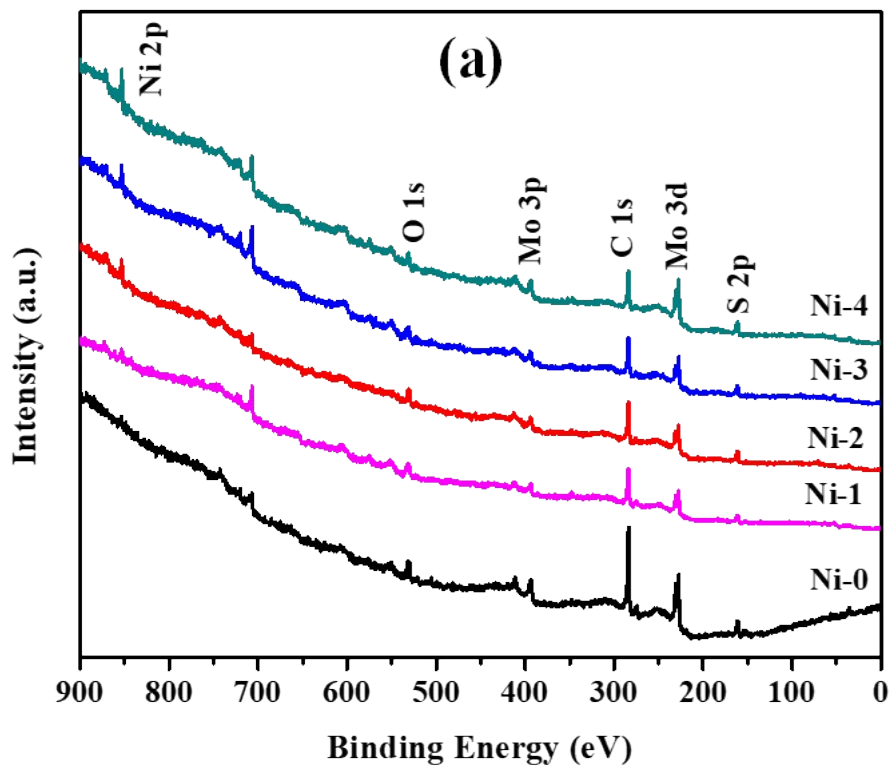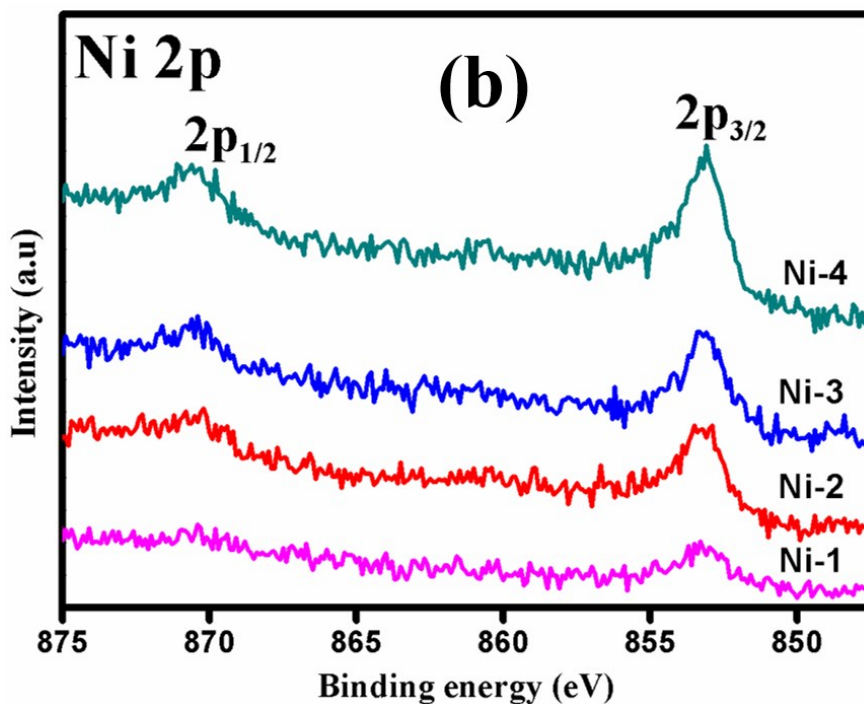

Figure S2 XPS spectra of (a) Survey spectra of MoS<sub>2</sub>/NiS<sub>2</sub> nanocomposites with varied NiS<sub>2</sub> contents, (b) Ni 2p states of MoS<sub>2</sub>/NiS<sub>2</sub> nanocomposites with varied NiS<sub>2</sub> contents.

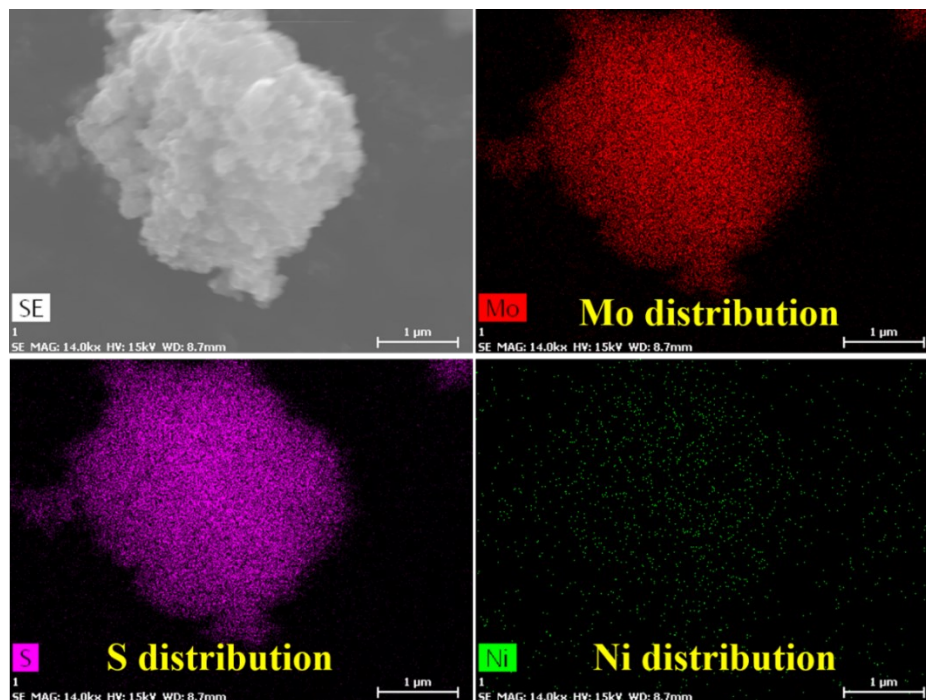

Figure S3 EDS elemental mapping of sample Ni-4

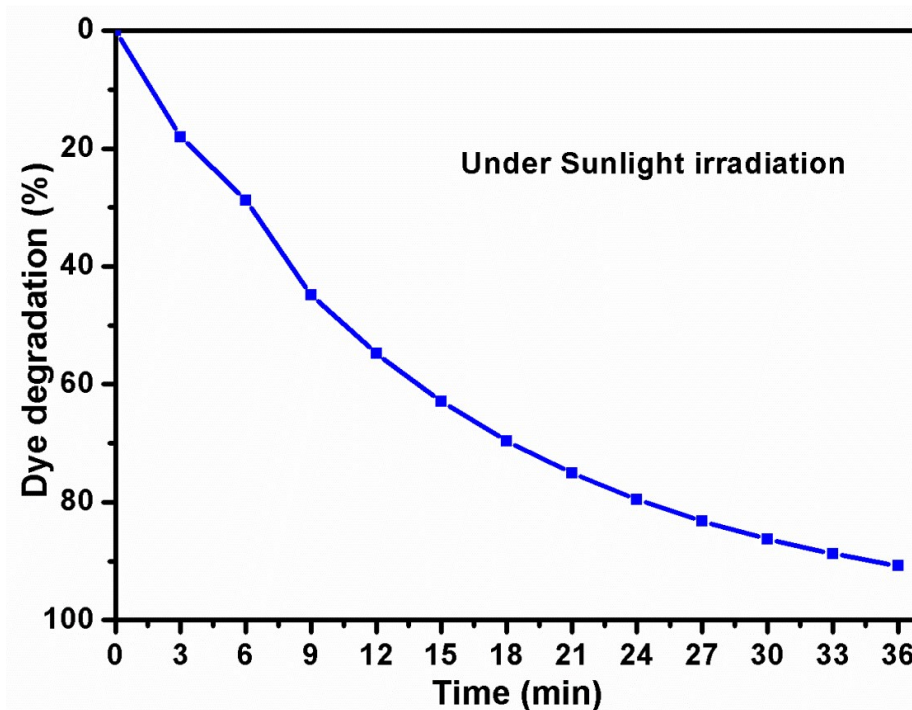

Figure S4 Photocatalytic performance of sample Ni-4

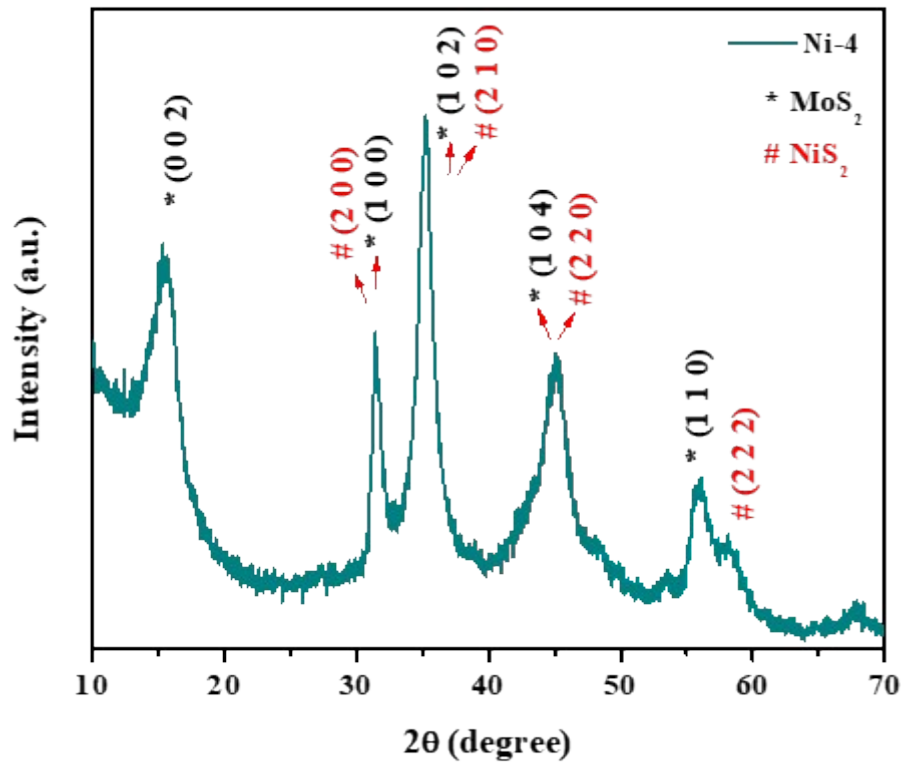

Figure S5 XRD patterns of Ni-4 sample after photocatalytic process
